# Supplementary material for: Synthesis, structure, magnetic properties and DFT calculations of two hydroxo-bridged complexes based on MnIII(Schiff-Bases)
Source: Royal Society of Chemistry journal article supplement (doi:10.1039/c0dt01544j), 2011-01-01
Supplement: c0dt01544j.pdf [file c0dt01544j.pdf]

## Electronic Supplementary Information

### Synthesis, Structure, Magnetic Properties and DFT Calculations of Two Hydroxo-Bridged Complexes Based on Mn<sup>III</sup> (Shiff-Bases)

Hong-Bo Zhou,<sup>a</sup> Hui-Sheng Wang,<sup>a</sup> Ying Chen,<sup>a</sup> Yong-Lu Xu,<sup>a</sup> Xiao-Jiao Song,<sup>a</sup> You Song,<sup>\*,a</sup>  
Yi-Quan Zhang<sup>\*,b</sup> and Xiao-Zeng You<sup>a</sup>

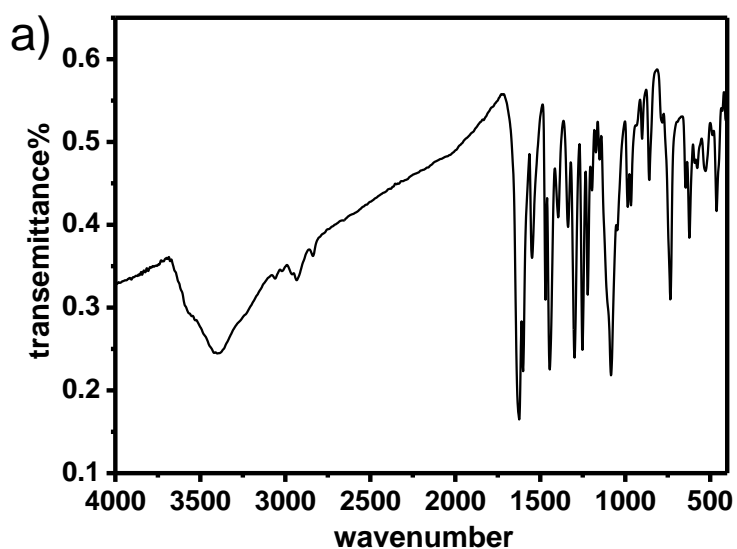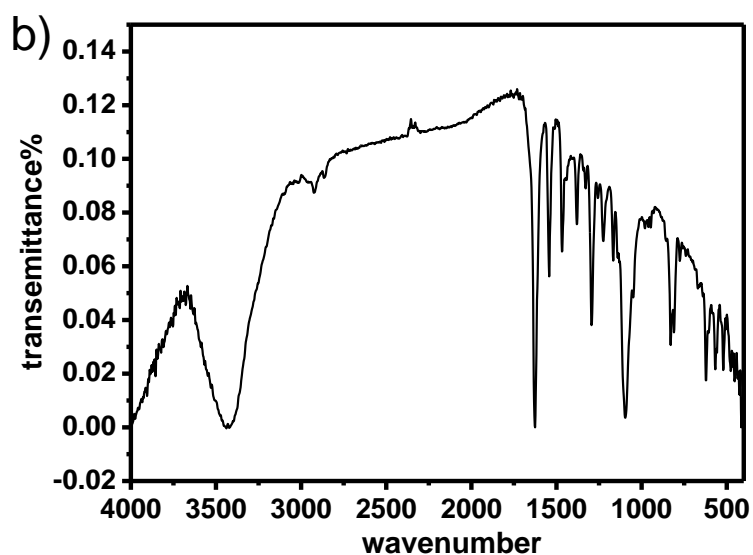

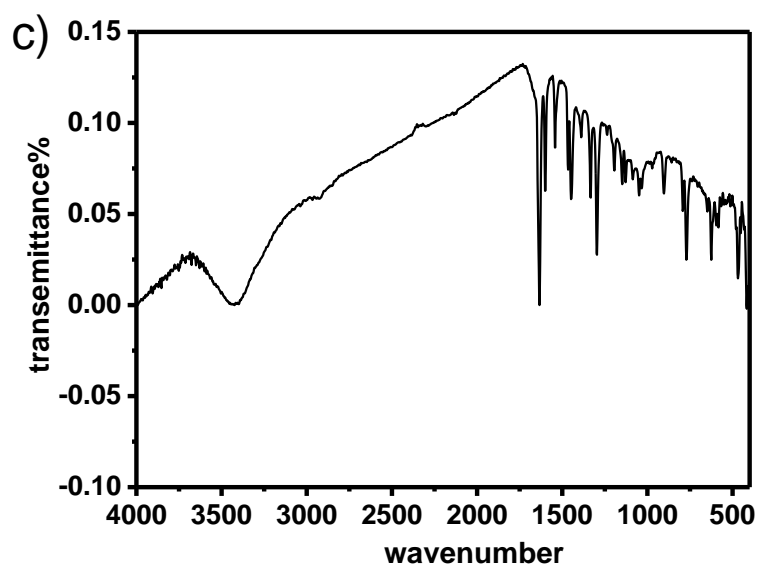

**Fig. S1** The IR spectrum of the complex 1(a), complex 2(b) and the precipitate(c)

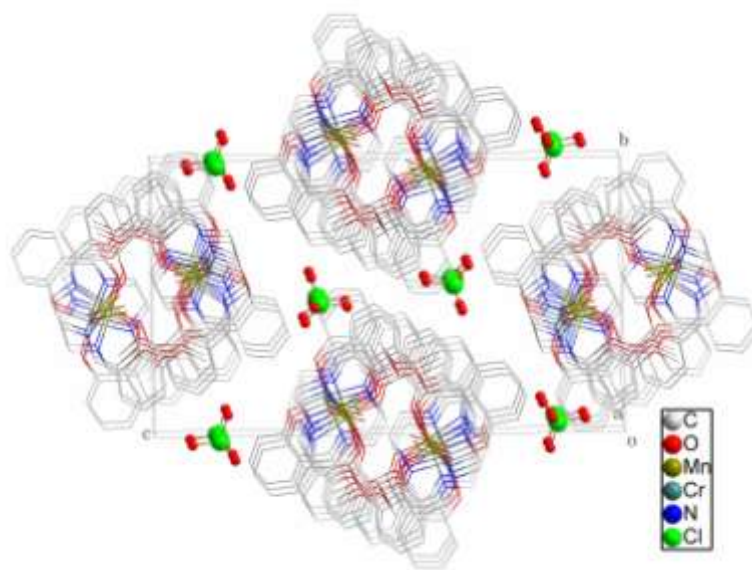

(a)

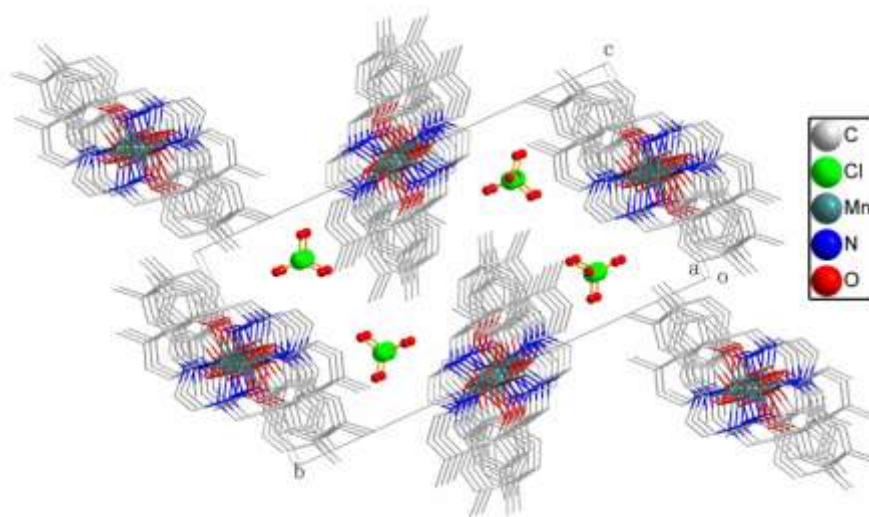

**Fig. S2** The crystal packing diagram of complex **1** (a) and **2** (b) along the *a* axis direction. The solvent molecules have been omitted for clarity.

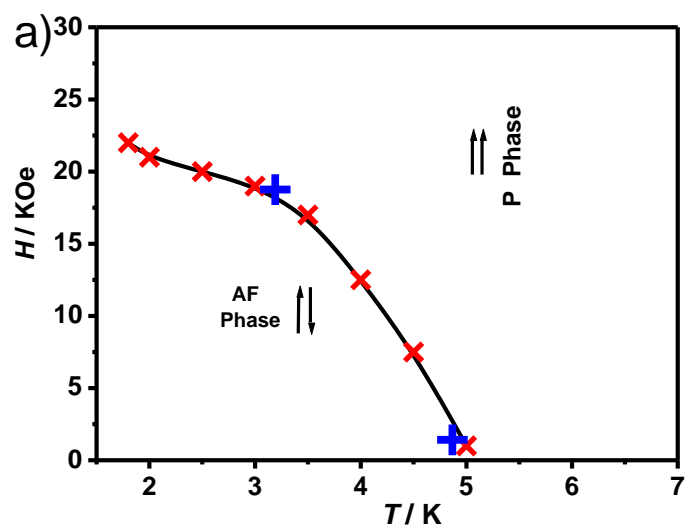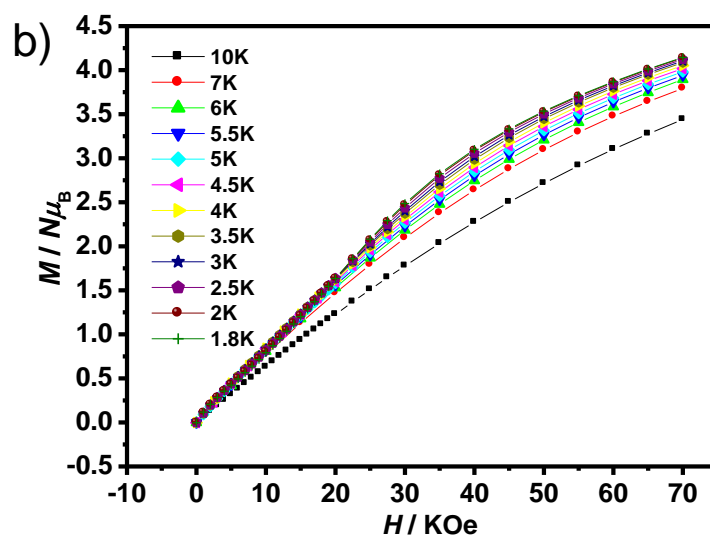

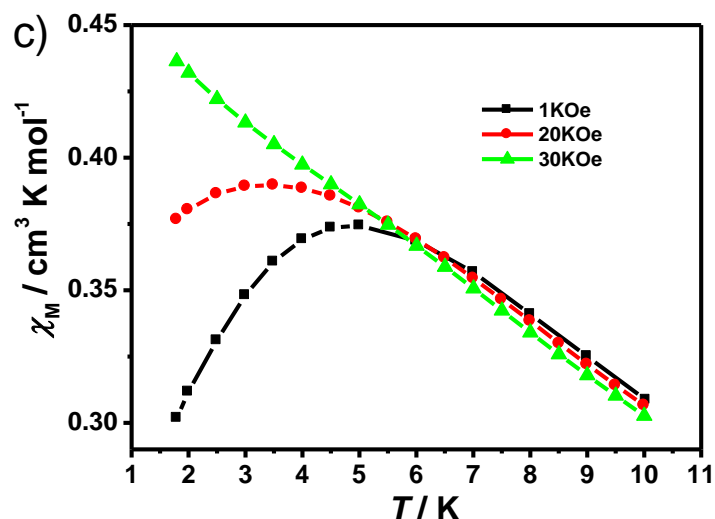

**Fig. S3** (a) Magnetic phase ( $T, H$ ) diagrams for **1**. (+: Location of the maximum of susceptibility from  $\chi_M$  vs  $T$  data;  $\times$ : Location of the maximum of susceptibility from  $dM/dH$  vs  $H$  data). (b) field-dependent magnetization measured up to 70 kOe at different temperature from 1.8 - 10 K for **1**. (c) Field-cooled magnetization for complex **1** in different applied fields from 1 - 30 kOe. (All the solid lines are a guide).

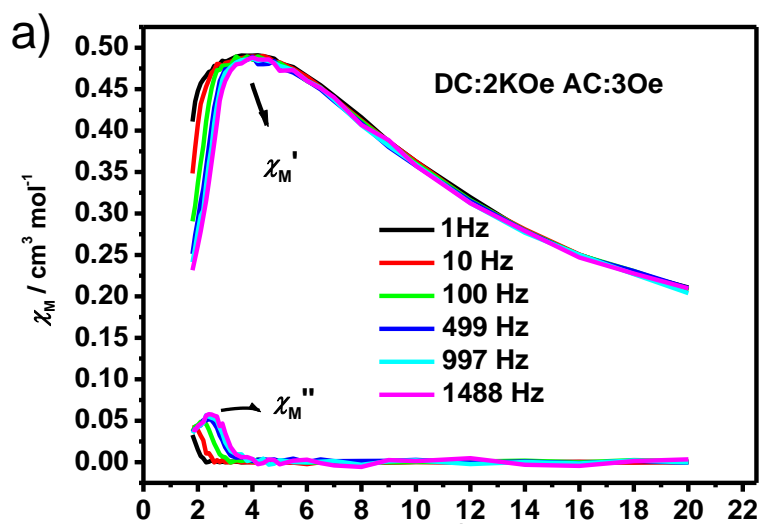

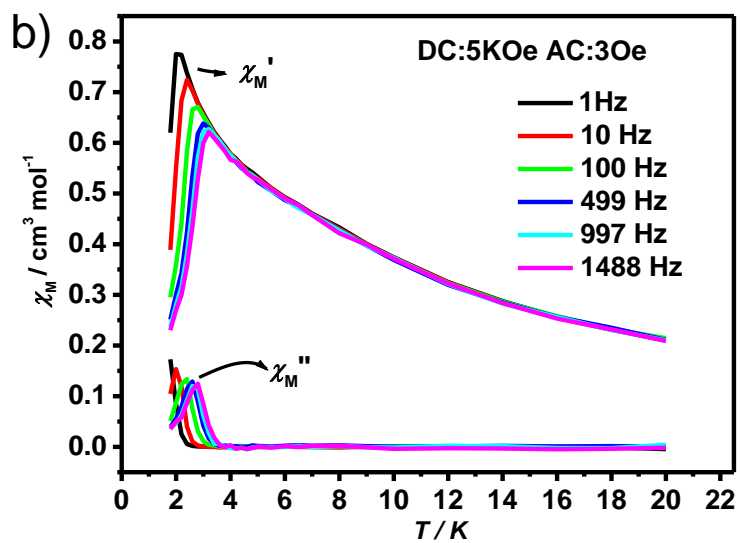

Fig. S4 (a) AC susceptibility measurements under dc field of 2kOe. (b) AC susceptibility measurements under dc field of 5kOe.

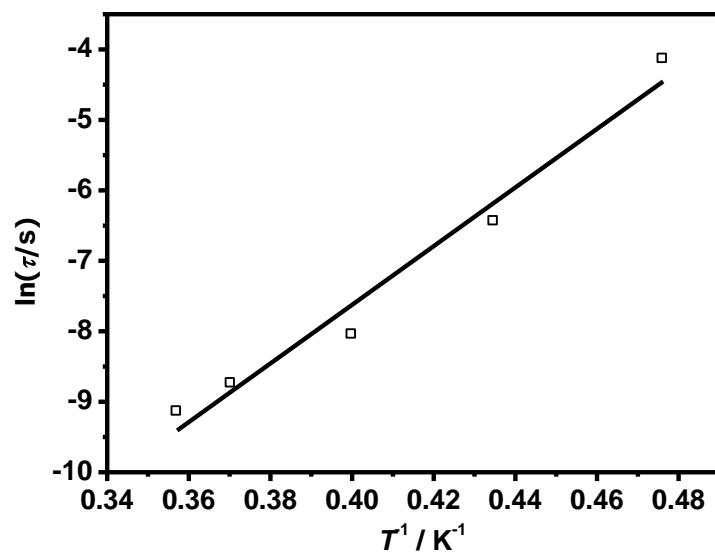

Fig. S5 Arrhenius plots for **1** obtained from the AC data under 5 kOe DC field.
